# Supplementary material for: Exercise: a “new drug” for elderly patients with chronic heart failure
Source: publisher site journal article supplement (doi:10.18632/aging.100901), 2016-03-04
Supplement: Supplementary file 1 [file aging-v8i5-100901-supplementary-material-SD1.docx]

| ***InterRAI_HC*** | **UCG T0**  **(n=173)** | **TCG T0**  **(n=170)** | ***Total***  **(N. 343)** | **p value** |
| --- | --- | --- | --- | --- |
| **Age** (mean±SD) | 77.60±6.02 | 76.21±5.21 | 76.90±5.67 | 0.145 |
| **Gender** :  Male | 92 (53.2%) | 103 (60.6%) | 195 (56.9%) | 0.166 |
| Female | 81 (46.8%) | 67 (39.4%) | 148 (43.1%) |
| **Marital Status**  Married | 80 (46.2%) | 90 (53.0%) | 170 (49.5%) | 0.344 |
| Never married | 14 (8.1%) | 7 (4.1%) | 22 (6.3%) |
| Divorced | 6 (3.5%) | 7 (4.1%) | 12 (3.6%) |
| **Education:**  Illiterate, n (%) | 20 (11.6%) | 24 (14.2%) | 44 (12.8%) | 0.385 |
| Primary school, n (%) | 92 (53.2%) | 73 (42.6%) | 165 (48.1%) |
| Secondary school, n (%) | 41 (23.7%) | 53 (31.4%) | 94 (27.4%) |
| High school, n (%) | 11 (6.4%) | 10 (5.9%) | 21 (6.1%) |
| Illiterate, n (%) | 9 (5.2%) | 10 (5.9%) | 19 (5.5%) |
| **Where Lived at Time of Refferal**  Private Home/ Apt n (%) | 170 (100%) | 173 (100%) | 343 (100%) | - |
| **Who Lived with :**  lived alone n (%)  lived with spouse only n (%)  lived with child n (%) | 34 (20%)  85 (50%)  51 (30%) | 52 (30%)  52 (30%)  69 (40%) | | 86 (25%) | | --- | | 137(40%) | | 120(35%) | | 0.756 |
| **Where came from**  Private Home/ Apt with no home care services n (%) | 173 (100%) | 170 (100%) | 343 (100%) | - |

| ***InterRAI_HC*** | **UCG T0**  **(n=173)** | **TCG T0**  **(n=170)** | **UCG T2**  **(n=173)** | **TCG T2**  **(n=170)** | **p value** |  |
| --- | --- | --- | --- | --- | --- | --- |
| **IADL** (mean±SD) | 5.1±3.32 | 4.98±4.59 | 5.67±5.32 | 5.18±4.75 | 0.408 |  |
| **ADL** (mean±SD) | 5.50±4.10 | 5.45±4.32 | 5.00±2.49 | 6.94±5.66 | **0.037** |  |
| **Cognitive skills for daily decision-making**  Independent  Minimally Impaired | 104 (60%)  69 (40%) | 108 (64%)  62 (36%) | 138 (80%)  35 (20%) | 170 (100%)  - | 0.064 | |
| **Memory recall Ability:**  Independent  Minimally Impaired | 121 (70%)  52 (30%) | 124 (73%)  46 (27%) | 104 (60%)  69 (40%) | 170 (100%)  - | 0.208 | |
| **Indicators of Delirium:**  Independent  Minimally Impaired | 138 (80%)  35 (20%) | 124 (73%)  46 (27%) | 138 (80%)  35 (20%) | 170 (100%)  - | 0.422 | |
| **Making self understood (Expression):**  Yes  No | 121 (70%)  52 (30%) | 139 (82%)  31 (18%) | 130 (75%)  43 (25%) | 170 (100%)  - | 0.626 | |
| **Ability to understand others (comprehension):**  Yes  No | 138 (80%)  35 (20%) | 155 (91%)  15 (9%) | 138 (80%)  35 (20%) | 170 (100%)  - | 0.350 | |
| **Hearing:**  Hears adequately  Minimal difficulty | 138 (80%)  35 (20%) | 139 (82%)  31 (18%) | 140 (81%)  33 (19%) | 141 (83%)  29 (17%) | 0.998 | |
| **Vision:**  Adequate  Impaired | 138 (80%)  35 (20%) | 143 (84%)  27 (16%) | 151 (87%)  22 (13%) | 146 (86%)  24 (14%) | 0.683 | |

| **Mood and Bevihavior Patters**  Indicators not exhibited in the last 3 days  Exhibited 1-2 of last 3 days | 121 (70%)  52 (30%) | 112 (66%)  58 (34%) | 104 (60%)  69 (40%) | 128 (75%)  43 (25%) | 0.634 |
| --- | --- | --- | --- | --- | --- |
| **Bladder Continence**:  Continent  Incontinent | 152 (88%)  22 (12%) | 155 (90%)  15 (10%) | 152 (88%)  17 (12%) | 170 (100%)  - | 0.909 |
| **Bowel Continence**:  Continent | 173 (100%) | 170 (100%) | 173 (100%) | 170 (100%) | - |
| **Falls**:  no  yes | 173 (100%)  - | 161 (95%)  9 (5%) | 156 (90%)  17 (10%) | 170 (100%)  - | - |
| **Intensity of Pain:**  no  daily: less than 4 hours  daily: at least every 2-4 hours | 52 (30%)  104 (60%)  17 (10%) | 77 (45%)  77 (45%)  15 (10%) | 128 (74%)  45 (26%)  - | 170 (100%)  -  - | <0.001 |
| **Medications adequately control pain**:  yes  no | 173 (100%)  - | 155 (91%)  15 (9%) | 173 (100%)  - | 170 (100%)  - | 0.348 |
| **Nutritionand Oral Status**  Adequate  Not Adequate | 156 (90%)  17 (10%) | 162 (95%)  9 (5%) | 147 (85%)  26 (15%) | 170 (100%)  - | 0.426 |
| **Skin Condition**  No Skin problems  Skin problems | 138 (80%)  35 (20%) | 132 (78%)  38 (22%) | 121 (70%)  52 (30%) | 149 (88%)  21 (12%) | 0.530 |
| **Compliance/ Adherence with medications**  always compliant | 173 (100%) | 170 (100%) | 173 (100%) | 170 (100%) | - |
